# Supplementary material for: Therapeutic Peptide Vaccine-Induced CD8 T Cells Strongly Modulate Intratumoral Macrophages Required for Tumor Regression
Source: Oxford University Press journal article supplement (doi:10.1158/2326-6066.cir-15-0052), 2015-04-17
Supplement: 23266066cir150052-sup-145836_1_supp_2926057_nm8nvy.docx [file 23266066cir150052-sup-145836_1_supp_2926057_nm8nvy.docx]

**Supplementary Table 1. RT-PCR primer sequences.**

| **Gene** | **Forward primer** | **Reverse primers** |
| --- | --- | --- |
| CCL2 | CGGAACCAAATGAGATCAGAACCTAC | GCTTCAGATTTACGGGTCAACTTCAC |
| CCL5 | ATTGCTTGCTCTAGTCCTA | ATGCTGATTTCTTGGGTTT |
| CCL12 | AAAACTCTTACGTATTTCCC | TCGGTTTAATTGGCCCAA |
| CXCL2* | GCCTTGCCTTTGTTCAGTATC | GCCTTGCCTTTGTTCAGTATC |
| CXCL9* | TGGAGTTCGAGGAACCCTAGT | AGGCAGGTTTGATCTCCGTT |
| CXCL10* | CCACGTGTTGAGATCATTGCC | GAGGCTCTCTGCTGTCCATC |
| CXCL11* | CGATCTCTGCCATTTTGACG | CGATCTCTGCCATTTTGACG |
| Arginase-1 | TGAGAGACCACGGGGACCTG | GCACCACACTGACTCTTCCATTC |
| CD11b | GAATGCTGCGAAGATCCTAGTTGTC | CGGGACTGTGGTTTGTTGAAGG |
| CD74 | AAACCTGTGAGCCAGATG | ATGTTGCCGTACTTGGTAA |
| FcR gamma | GCCGTGATCTTGTTCTTG | ACAGTAGAGTAGGGTAAGGA |
| Β-actin | CGGGACCTGACTGACTACCTC | CTCCTTAATGTCACGCACGATTTC |
| GAPDH | GTGCTGAGTATGTCGTGGAGTCTAC | GGCGGAGATGATGACCCTTTTGG |

Primer sequences are 5’ to 3’ and were obtained from Sigma Aldrich, Zwijndrecht, The Netherlands, unless indicated with an asterics (*), which were obtained from invitrogen.
